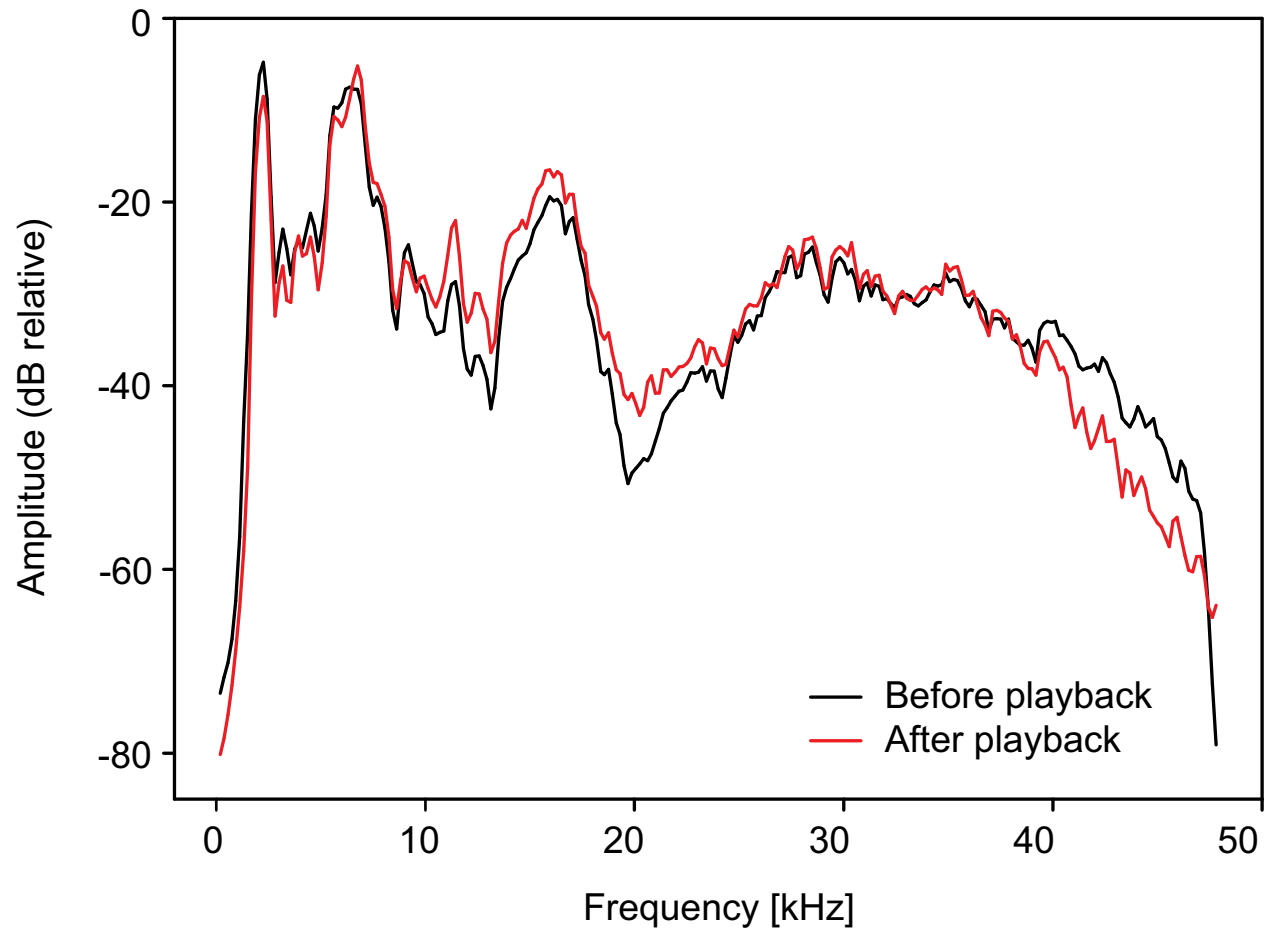

**Fig. S1.** Power spectra of the chirp used for behavioural and neurophysiological experiments. Black curve: power spectrum of the chirp before playback. Red curve: power spectrum of the chirp after recording the playback at the position of the preparation.
